# Supplementary material for: PQQ Dietary Supplementation Prevents Alkylating Agent-Induced Ovarian Dysfunction in Mice
Source: PubMed Central journal article supplement (PMC8948422; doi:10.3389/fendo.2022.781404), 2022-03-07
Supplement: Image_1.pdf [file Image_1.pdf]

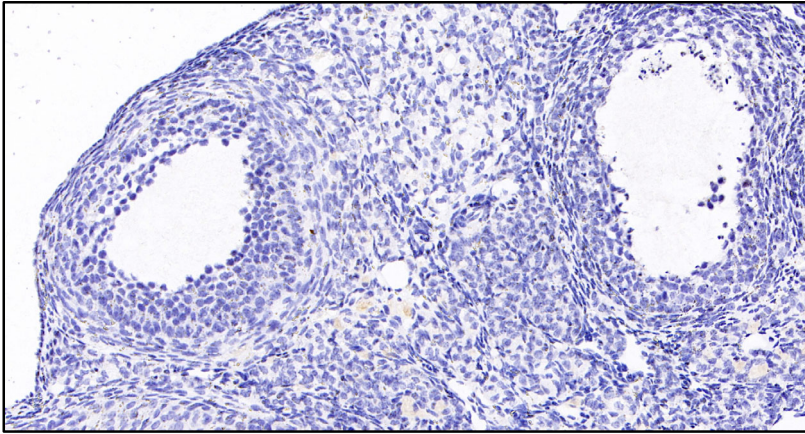

**Supplementary figure 1** An image of negative control for IHC. Ovarian section without incubating with primary antibody.
